# Supplementary material
Source: Springer Nature journal article supplement (https://www.springermedizin.de/resource/supplementary/13075_2004_1655_MOESM6_ESM.pdf/9690272)

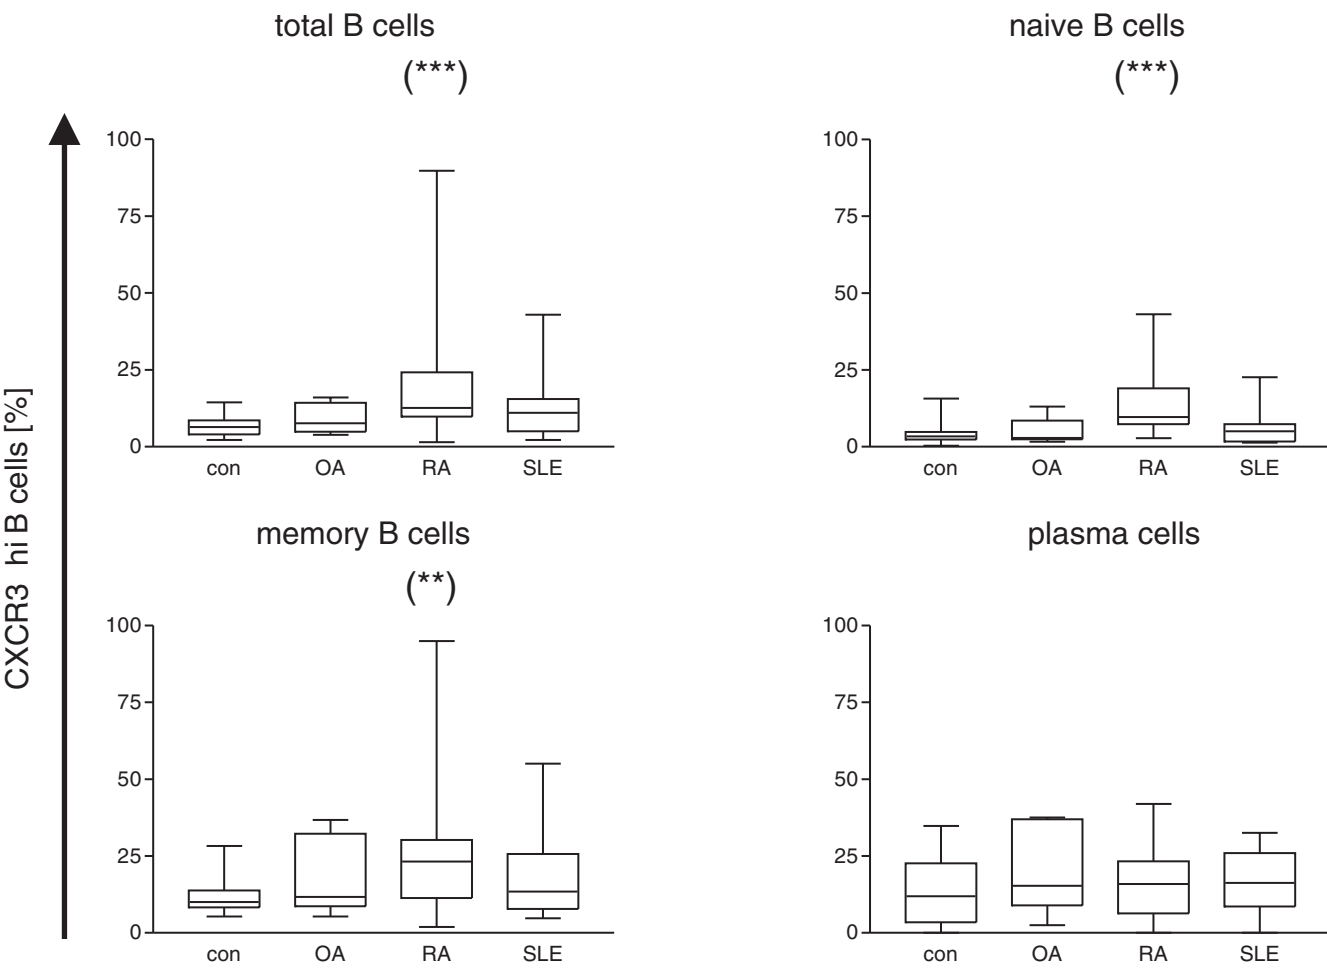

Supplement: MOESM6 [file 9690272]
